# Supplementary material for: UHPLC-OrbiTrap MS Characterization of Phenolic Profiles in French Marigold Extracts and Analysis of Their Antifeedant Activity against Colorado Potato Beetle
Source: MDPI journal article supplement (doi:10.3390/plants11030407), 2022-02-01
Supplement: s1 [file s1]

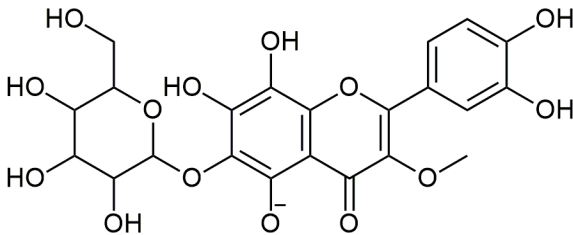

**Molecular ion**  
 $\text{C}_{22}\text{H}_{21}\text{O}_{14}^-$   
 509.09368 *m/z*

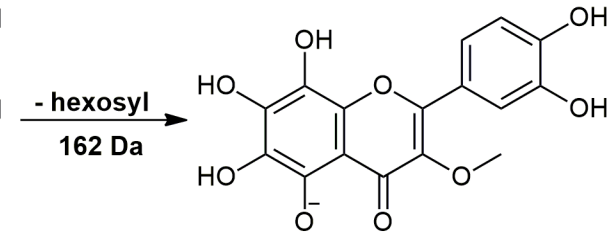

**MS<sup>2</sup> base peak**  
 $\text{C}_{16}\text{H}_{11}\text{O}_9^-$   
 347 *m/z*

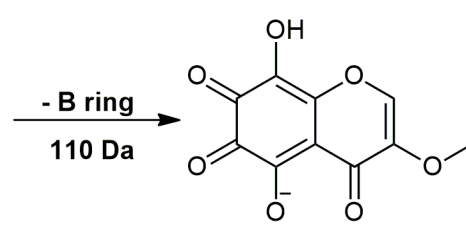

**MS<sup>3</sup> base peak**  
 $\text{C}_{10}\text{H}_5\text{O}_7^-$   
 237 *m/z*

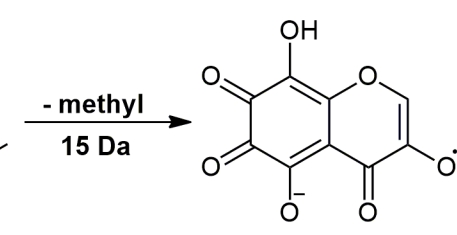

**MS<sup>4</sup> base peak**  
 $\text{C}_9\text{H}_2\text{O}_7^{\bullet-}$   
 222 *m/z*
