# Supplementary material for: UHPLC-OrbiTrap MS Characterization of Phenolic Profiles in French Marigold Extracts and Analysis of Their Antifeedant Activity against Colorado Potato Beetle
Source: MDPI journal article supplement (doi:10.3390/plants11030407), 2022-02-01
Supplement: s1 [file s1]

**Supplementary Table S2.** Peak areas from the full scan MS spectra for identified phenolics in French marigold flowers and leaves extracts obtained in water, methanol (MeOH) and dichloromethane (DCM)

|                                    |                                | Flowers  |          |     | Leaves   |          |     |
|------------------------------------|--------------------------------|----------|----------|-----|----------|----------|-----|
|                                    |                                | Water    | MeOH     | DCM | Water    | MeOH     | DCM |
| <i>Phenolic acids / glycosides</i> |                                |          |          |     |          |          |     |
| 1                                  | Galloylquinic acid I           | 2726763  | 5684281  |     |          | 1175310  |     |
| 2                                  | Gallic acid hexoside           | 353607   |          |     | 560503   | 3408919  |     |
| 3                                  | Gallic acid                    | 17467976 | 3288340  |     |          |          |     |
| 4                                  | Galloylquinic acid II          | 7079504  | 12032618 |     |          | 3901552  |     |
| 5                                  | Dihydroxybenzoic acid hexoside | 1639681  | 832143   |     | 21024399 | 18034291 |     |
| 6                                  | Caffeoylglucaric acid I        | 1874435  |          |     |          |          |     |
| 7                                  | Caffeoylglucaric acid II       | 2605216  |          |     | 223388   |          |     |
| 8                                  | Protocatechuic acid            | 30444008 | 7791086  |     | 4458420  | 2104843  |     |
| 9                                  | Digalloylquinic acid I         | 189880   | 219886   |     |          | 2680894  |     |
| 10                                 | 3-O-Caffeoylquinic acid        | 3094608  | 625839   |     | 168874   | 224667   |     |
| 11                                 | Caffeic acid hexoside I        |          |          |     | 153964   | 551547   |     |
| 12                                 | Caffeoylglucaric acid III      | 2516540  |          |     | 219346   |          |     |
| 13                                 | Digalloyl-dihexoside           | 59036    | 5397848  |     |          | 411834   |     |
| 14                                 | Digalloylquinic acid II        | 2683052  | 6870984  |     |          | 4134116  |     |
| 15                                 | Hydroxybenzoic acid hexoside   | 489754   | 494786   |     | 1408275  | 3028240  |     |
| 16                                 | Syringoyl-galloyl hexoside I   | 977505   | 2437475  |     |          | 489190   |     |
| 17                                 | Caffeic acid hexoside II       | 382107   | 524731   |     | 342720   | 1602738  |     |
| 18                                 | Syringoyl-galloyl hexoside II  | 1464624  | 5096652  |     |          | 893096   |     |
| 19                                 | 5-O-Caffeoylquinic acid        | 5500260  | 36174680 |     | 1756839  | 16229651 |     |
| 20                                 | Trigalloylquinic acid          |          | 160692   |     |          | 7401045  |     |
| 21                                 | Dicaffeoylmaltronic acid I     | 15697750 |          |     |          |          |     |
| 22                                 | Caffeic acid pentoside I       |          |          |     | 317579   | 1844521  |     |
| 23                                 | Ellagic acid hexoside          |          | 4967412  |     |          | 6598921  |     |
| 24                                 | Caffeic acid                   | 43433276 | 1184675  |     | 608233   | 736138   |     |

|                   |                                     |          |           |          |           |          |         |
|-------------------|-------------------------------------|----------|-----------|----------|-----------|----------|---------|
| 25                | Syringoyl-methylgalloyl hexoside I  | 719315   | 1811086   |          |           |          |         |
| 26                | Caffeoyl-(iso)citric acid           | 905022   | 274949    |          | 25380759  | 16610842 | 92375   |
| 27                | Caffeic acid pentoside II           | 595121   | 995968    |          | 2025565   | 17973326 | 125634  |
| 28                | Syringoyl-methylgalloyl hexoside II | 1608728  | 4334909   |          | 101729    | 137111   |         |
| 29                | Methyl chlorogenate                 | 77044    | 880566    |          | 1756964   | 2190273  |         |
| 30                | Dicaffeoylaltraric acid II          | 4713779  |           |          |           |          |         |
| 31                | Coumaric acid hexoside              | 1320969  | 527512    |          | 2523052   | 756057   |         |
| 32                | Dicaffeoylaltraric acid III         | 4236650  | 144286    |          |           |          |         |
| 33                | Disyringoyl hexoside I              | 1540743  | 3031824   |          |           |          | 71269   |
| 34                | Mehylellagic acid hexoside          |          | 2251357   |          |           | 7815412  |         |
| 35                | Disyringoyl hexoside II             | 2463099  | 6296924   | 177199   | 299008    | 340213   | 153758  |
| 36                | Coumaroyl-(iso)citric acid          | 1629759  | 299576    |          | 43954373  | 16062630 |         |
| 37                | Feruloyl-(iso)citric acid           | 12525886 | 4508555   |          | 127066846 | 57148007 | 513137  |
| 38                | Ellagic acid                        | 1207313  | 11022261  |          |           | 1162901  |         |
| 39                | Vanillic acid                       | 3133472  | 2571448   |          | 426515    | 488697   |         |
| 40                | Dicaffeoylquinic acid I             | 5720797  | 24025408  | 128982   | 102074    | 15703724 | 70072   |
| 41                | Dicaffeoylquinic acid II            |          |           | 70239    |           | 3747503  |         |
| 42                | Tricaffeoylglucaric acid            | 11619014 | 7249802   |          |           | 158462   |         |
| 43                | Methylellagic acid                  | 340985   | 3476514   |          | 142747    | 1194839  |         |
| 44                | Ferulic acid                        | 257441   | 417898    |          | 4130087   | 2617146  |         |
| 45                | Dimethylellagic acid hexoside       |          | 1466942   |          |           |          |         |
| 46                | Dimethylellagic acid                | 2077834  | 97761721  | 2402785  |           | 1720916  | 84739   |
| <b>Flavonoids</b> |                                     |          |           |          |           |          |         |
| 47                | Quercetagenin                       | 132480   | 29188850  |          |           |          |         |
| 48                | Luteolin <sup>a</sup>               | 3421116  | 81625041  | 185492   |           | 1379732  |         |
| 49                | 6-Hydroxykaempferol                 | 1224978  | 8529246   | 809880   | 315421    | 3034643  | 333329  |
| 50                | 8-Hydroxy-3-O-methylquercetagenin   | 1274384  | 28729475  | 313606   |           | 1930408  |         |
| 51                | Patuletin                           | 40618617 | 337392962 | 15611804 | 528291    | 52811159 | 1363322 |
| 52                | Apigenin <sup>a</sup>               | 144153   | 3604935   |          |           | 271657   |         |

|                             |                                                 |         |          |        |         |          |        |
|-----------------------------|-------------------------------------------------|---------|----------|--------|---------|----------|--------|
| 53                          | Kaempferol <sup>a</sup>                         | 417270  | 2287967  | 657480 | 164870  | 1500441  | 261625 |
| 54                          | Chrysoeriol <sup>a</sup>                        |         | 2785543  |        |         |          |        |
| 55                          | 6-Methoxykaempferol                             | 360761  | 37796625 | 899009 |         | 2305050  | 237161 |
| 56                          | Axillarin                                       |         | 2353522  |        |         | 766458   | 242819 |
| 57                          | 5,7-Dimethylquercetin                           |         |          |        |         | 850982   | 174681 |
| 58                          | 8-Hydroxyquercetagenin                          | 3323127 | 22644123 |        |         |          |        |
| <b>Flavonoid glycosides</b> |                                                 |         |          |        |         |          |        |
| 59                          | Quercetagenin 3,7-di-O-hexoside                 |         | 502365   |        |         | 2289123  |        |
| 60                          | Quercetagenin 3-O-pentoside-7-O-hexoside        |         | 167120   |        |         | 830331   |        |
| 61                          | Quercetin 3,7-di-O-hexoside                     |         | 1796508  |        |         | 4631457  |        |
| 62                          | Patuletin 3,7-di-O-hexoside I                   |         | 10166420 |        |         | 15362042 |        |
| 63                          | Quercetin 3-O-pentoside-7-O-hexoside            |         | 694092   |        |         | 6839927  |        |
| 64                          | Patuletin 3-O-pentoside-7-O-hexoside            |         | 1725930  |        |         | 9301886  |        |
| 65                          | 6-Methoxykaempferol 3-O-pentoside-7-O-hexoside  |         |          |        |         | 1885344  |        |
| 66                          | Patuletin 3,7-di-O-hexoside II                  |         | 3315580  |        |         | 123926   |        |
| 67                          | Quercetin 3-O-hexoside-7-O-rhamnoside           |         | 21524649 |        | 425620  | 62476127 | 510893 |
| 68                          | Patuletin 3-O-(2"-hexosyl)hexoside              | 1358159 | 3011399  |        |         |          |        |
| 69                          | Quercetin 3-O-rhamnoside-7-O-pentoside          |         | 9442613  | 61183  | 1704243 | 49634014 | 484744 |
| 70                          | Quercetin 3-O-(6"-hexosyl)hexoside              | 988151  | 8136907  |        | 5510269 | 19696048 | 119978 |
| 71                          | Quercetagenin 6-O-hexoside                      |         | 58972571 | 147565 |         | 12179482 |        |
| 72                          | Quercetin 3-O-(6"-galloyl)hexoside-7-O-hexoside |         | 141399   |        |         | 4275669  |        |
| 73                          | Patuletin 3-O-(6"-hexosyl)hexoside              | 1437344 | 18091487 | 206580 | 222044  | 3716661  |        |
| 74                          | Quercetin 3-O-(6"-pentosyl)hexoside             | 1791935 | 3578742  |        | 177888  | 3345275  |        |
| 75                          | Quercetin 3,7-di-O-rhamnoside                   |         | 12307193 | 94847  | 6708679 | 54885163 | 527701 |
| 76                          | Kaempferol 3-O-pentoside-7-O-rhamnoside         |         | 255392   |        | 235238  | 9606619  | 78430  |
| 77                          | Kaempferol 3-O-hexoside-7-O-pentoside           | 76628   | 743223   |        | 2079529 | 19682381 | 205495 |
| 78                          | Kaempferol 3-O-(6"-hexosyl)hexoside             |         | 681257   |        | 1435699 | 20946406 | 77847  |

|     |                                                  |         |           |         |          |          |
|-----|--------------------------------------------------|---------|-----------|---------|----------|----------|
| 79  | Quercetin 3-O-(6"-galloyl)hexoside               | 141746  | 1931768   |         | 26401271 | 103294   |
| 80  | 6-Methoxykaempferol 3-O-(6"-hexosyl)hexoside     | 225856  | 2175059   | 618228  | 2853561  |          |
| 81  | Patuletin 7-O-(6"-galloyl)hexoside               | 398307  | 2221821   |         |          |          |
| 82  | Kaempferol 3-O-rhamnoside-7-O-rhamnoside         |         | 174155    | 391095  | 11661628 | 149661   |
| 83  | Quercetin 3-O-glucoside <sup>a</sup>             | 1001399 | 11129137  | 81054   | 2002753  | 83837241 |
| 84  | Kaempferol 3-O-rhamnoside-7-O-pentoside          |         |           | 191295  | 5875294  | 766011   |
| 85  | Kaempferol 7-O-(6"-galloyl)hexoside              |         |           |         | 3697732  |          |
| 86  | Patuletin 7-O-hexoside                           | 1543862 | 167730168 | 2325685 | 28055167 | 142103   |
| 87  | 8-Hydroxy-3-O-methyl quercetagetin 6-O-hexoside  |         | 8104156   |         | 583970   |          |
| 88  | Quercetin 3-O-galloyl-rhamnoside-7-O-rhamnoside  |         | 220522    |         | 5351948  |          |
| 89  | Kaempferol 3-O-glucoside <sup>a</sup>            | 638089  |           | 1118234 | 4377422  |          |
| 90  | Quercetin 3-O-pentoside                          | 2438489 | 7239489   | 5748534 | 46975440 | 174289   |
| 91  | Patuletin 3-O-pentoside                          | 432903  | 2028365   | 939071  | 4467177  |          |
| 92  | Quercetin 3-O-rhamnoside <sup>a</sup>            | 1125253 | 7040595   | 5617038 | 7953994  |          |
| 93  | Axillarin 7-O-(6"-rhamnosyl)hexoside             |         |           | 2547040 | 5696052  |          |
| 94  | Quercetin 3-O-(2"-galloyl)-pentoside             | 166544  | 2281634   |         | 25874199 | 107385   |
| 95  | 6-Methoxykaempferol 7-O-hexoside                 |         | 17382518  |         | 2768290  |          |
| 96  | Kaempferol 3-O-galloyl-rhamnoside-7-O-rhamnoside |         |           |         | 5514139  |          |
| 97  | Kaempferol 3-O-pentoside                         |         |           | 562237  | 3032392  |          |
| 98  | Luteolin 7-O-glucoside <sup>a</sup>              |         | 10770488  | 178110  | 1113854  |          |
| 99  | Quercetagetin-7-methyl ether 6-O-hexoside        | 164016  | 22374573  |         | 556642   |          |
| 100 | 5,7-Dimethylquercetin 3-O-rutinoside             |         |           | 1011260 | 3088918  |          |
| 101 | Axillarin 7-O-hexoside                           |         |           | 100535  | 5006036  |          |
| 102 | Kaempferol 3-O-(2"-galloyl)-pentoside            |         |           |         | 2853731  |          |
| 103 | 3,3'-Dimethylquercetin 7-O-hexoside              |         | 94477     |         | 3167728  |          |

|     |                                                          |       |         |         |
|-----|----------------------------------------------------------|-------|---------|---------|
| 104 | Trimethylquercetageretin rutinoside                      |       | 643353  | 1867861 |
| 105 | Patuletin 7- <i>O</i> -(6"-hydroxybenzoyl)hexoside       |       | 2006097 |         |
| 106 | Axillarin 7- <i>O</i> -(6"-caffeoyl)hexoside             | 65828 | 2701602 |         |
| 107 | Axillarin 7- <i>O</i> -pentoside                         |       |         | 1079968 |
| 108 | Patuletin 3- <i>O</i> -(6"- <i>p</i> -coumaroyl)hexoside |       | 1403542 | 102815  |
| 109 | Quercetin 3- <i>O</i> -(6"-vaniloyl)hexoside             |       | 101985  | 1412093 |
| 110 | Quercetin 3- <i>O</i> -(2"-hydroxybenzoyl)-pentoside     |       | 231934  | 898591  |
| 111 | Kaempferol 7- <i>O</i> -rhamnoside                       |       | 136930  | 659536  |
| 112 | Patuletin 7- <i>O</i> -(6"-benzoyl)hexoside              |       | 1173062 |         |
| 113 | Quercetin 3- <i>O</i> -(6"- <i>p</i> -coumaroyl)hexoside |       | 226625  | 598889  |
