# Supplementary material for: UHPLC-OrbiTrap MS Characterization of Phenolic Profiles in French Marigold Extracts and Analysis of Their Antifeedant Activity against Colorado Potato Beetle
Source: MDPI journal article supplement (doi:10.3390/plants11030407), 2022-02-01
Supplement: s1 [file s1]

**Supplementary Table S1.** UHPLC-OrbiTrap MS data of phenolics identified in French marigold extracts.

| No                    | Compound name                  | <i>t<sub>R</sub></i> , min | Molecular formula, [M–H] <sup>–</sup>                        | Calculated mass, [M–H] <sup>–</sup> | Exact mass, [M–H] <sup>–</sup> | Δ ppm | MS <sup>2</sup> Fragments, (% Base Peak)                               | MS <sup>3</sup> Fragments, (% Base Peak)                             | MS <sup>4</sup> Fragments, (% Base Peak)                           | References (DOI)             |
|-----------------------|--------------------------------|----------------------------|--------------------------------------------------------------|-------------------------------------|--------------------------------|-------|------------------------------------------------------------------------|----------------------------------------------------------------------|--------------------------------------------------------------------|------------------------------|
| <i>Phenolic acids</i> |                                |                            |                                                              |                                     |                                |       |                                                                        |                                                                      |                                                                    |                              |
| 1                     | Galloylquinic acid I           | 1.58                       | C <sub>14</sub> H <sub>15</sub> O <sub>10</sub> <sup>–</sup> | 343.06707                           | 343.06650                      | 1.68  | 125(10), 167(3), <b>169</b> (100), 170(13), 191(90), 192(8), 297(7)    | <b>125</b> (100)                                                     | 81(19), <b>107</b> (100), 169(3)                                   | 10.3390/molecules26051201    |
| 2                     | Gallic acid hexoside           | 1.94                       | C <sub>13</sub> H <sub>15</sub> O <sub>10</sub> <sup>–</sup> | 331.06707                           | 331.06649                      | 1.76  | 125(15), <b>169</b> (100), 170(9), 271(4)                              | <b>125</b> (100)                                                     |                                                                    | 10.3390/nu10122002           |
| 3                     | Gallic acid                    | 2.34                       | C <sub>7</sub> H <sub>5</sub> O <sub>5</sub> <sup>–</sup>    | 169.01425                           | 169.01411                      | 0.84  | 84(3), 123(6), <b>125</b> (100), 126(11)                               | 62(36), 81(47), <b>97</b> (100)                                      |                                                                    | 10.1002/cbdv.201600463       |
| 4                     | Galloylquinic acid II          | 2.36                       | C <sub>14</sub> H <sub>15</sub> O <sub>10</sub> <sup>–</sup> | 343.06707                           | 343.06649                      | 1.69  | 169(7), <b>191</b> (100), 192(7)                                       | 85(80), 93(45), 109(15), 111(44), <b>127</b> (100), 171(28), 173(57) | 83(19), 85(52), 99(18), <b>109</b> (100)                           | 10.3390/molecules26051201    |
| 5                     | Dihydroxybenzoic acid hexoside | 3.82                       | C <sub>13</sub> H <sub>15</sub> O <sub>9</sub> <sup>–</sup>  | 315.07216                           | 315.07165                      | 1.61  | 108(10), 109(12), 151(8), 152(43), <b>153</b> (100), 163(9), 165(12)   | <b>109</b> (100)                                                     |                                                                    |                              |
| 6                     | Caffeoylglucaric acid I        | 3.95                       | C <sub>15</sub> H <sub>15</sub> O <sub>11</sub> <sup>–</sup> | 371.06199                           | 371.06149                      | 1.35  | 191(14), 192(3), <b>209</b> (100), 210(8), 315(15), 335(4), 353(15)    | 85(12), 147(3), <b>191</b> (100)                                     | <b>85</b> (100), 111(11), 129(6), 145(3), 147(29), 173(21)         | 10.1016/j.chroma.2016.04.043 |
| 7                     | Caffeoylglucaric acid II       | 4.29                       | C <sub>15</sub> H <sub>15</sub> O <sub>11</sub> <sup>–</sup> | 371.06199                           | 371.06138                      | 1.64  | 191(18), <b>209</b> (100), 210(5), 335(3), 353(11), 354(3)             | 85(10), 147(3), <b>191</b> (100)                                     | <b>85</b> (100), 111(5), 129(15), 147(13), 173(45)                 | 10.1016/j.chroma.2016.04.043 |
| 8                     | Protocatechuic acid            | 4.31                       | C <sub>7</sub> H <sub>5</sub> O <sub>4</sub> <sup>–</sup>    | 153.01933                           | 153.01928                      | 0.34  | 107(3), 108(4), <b>109</b> (100), 110(8)                               | <b>81</b> (100)                                                      |                                                                    | 10.1039/C5AY03256C           |
| 9                     | Digalloylquinic acid I         | 4.43                       | C <sub>21</sub> H <sub>19</sub> O <sub>14</sub> <sup>–</sup> | 495.07803                           | 495.07775                      | 0.56  | 169(22), 325(37), <b>343</b> (100), 344(19), 411(6), 447(9), 457(11)   | 125(19), <b>169</b> (100), 173(12), 191(33), 325(4)                  | <b>125</b> (100)                                                   |                              |
| 10                    | 3-O-Caffeoylquinic acid        | 4.58                       | C <sub>16</sub> H <sub>17</sub> O <sub>9</sub> <sup>–</sup>  | 353.08781                           | 353.08705                      | 2.14  | 135(10), 173(4), 179(41), <b>191</b> (100), 192(9), 199(23), 318(5)    | 85(66), 93(35), 109(29), 111(44), <b>127</b> (100), 171(38), 173(83) |                                                                    | 10.1016/j.jff.2012.05.002    |
| 11                    | Caffeic acid hexoside I        | 4.60                       | C <sub>15</sub> H <sub>17</sub> O <sub>9</sub> <sup>–</sup>  | 341.08781                           | 341.08751                      | 0.88  | 135(56), <b>179</b> (100), 180(10), 281(10), 293(25), 295(9), 305(30)  | <b>135</b> (100), 151(5)                                             |                                                                    | 10.1021/np020018i            |
| 12                    | Caffeoylglucaric acid III      | 4.68                       | C <sub>15</sub> H <sub>15</sub> O <sub>11</sub> <sup>–</sup> | 371.06199                           | 371.06158                      | 1.10  | 191(21), 197(6), 199(11), <b>209</b> (100), 210(6), 335(4), 353(9)     | 85(10), 147(3), <b>191</b> (100)                                     | <b>85</b> (100), 111(3), 129(3), 147(16), 173(7)                   | 10.1016/j.chroma.2016.04.043 |
| 13                    | Digalloyl-dihexoside           | 4.77                       | C <sub>26</sub> H <sub>29</sub> O <sub>19</sub> <sup>–</sup> | 645.13085                           | 645.12989                      | 1.49  | 271(15), 313(24), 465(26), 475(42), 483(41), <b>493</b> (100), 494(27) | 169(28), 211(10), 223(3), 271(74), <b>313</b> (100), 314(7), 331(15) | 107(6), 123(5), 125(20), <b>169</b> (100), 211(10), 251(5), 253(5) | 10.3390/molecules26051201    |
| 14                    | Digalloylquinic acid II        | 4.83                       | C <sub>21</sub> H <sub>19</sub> O <sub>14</sub> <sup>–</sup> | 495.07803                           | 495.07797                      | 0.11  | 169(4), 191(3), 325(9), <b>343</b> (100), 344(11), 345(3)              | 125(13), <b>169</b> (100), 191(99)                                   | <b>125</b> (100)                                                   |                              |
| 15                    | Hydroxybenzoic acid hexoside   | 5.00                       | C <sub>13</sub> H <sub>15</sub> O <sub>8</sub> <sup>–</sup>  | 299.07724                           | 299.07714                      | 0.33  | <b>137</b> (100), 138(8)                                               | <b>93</b> (100)                                                      |                                                                    |                              |
| 16                    | Syringoyl-galloyl hexoside I   | 5.03                       | C <sub>22</sub> H <sub>23</sub> O <sub>14</sub> <sup>–</sup> | 511.10933                           | 511.10927                      | 0.11  | 169(76), 183(22), 271(19), <b>313</b> (100), 314(15),                  | 125(9), 151(3), <b>169</b> (100), 179(4), 241(11), 253(6),           | <b>125</b> (100)                                                   | 10.3390/molecules26051201    |

|    |                                     |      |                                                              |           |           |       |                                                                        |                                                                        |                                                                      |                               |
|----|-------------------------------------|------|--------------------------------------------------------------|-----------|-----------|-------|------------------------------------------------------------------------|------------------------------------------------------------------------|----------------------------------------------------------------------|-------------------------------|
|    |                                     |      |                                                              |           |           |       | 347(12), 373(14)                                                       | 295(6)                                                                 |                                                                      |                               |
| 17 | Caffeic acid hexoside II            | 5.15 | C <sub>15</sub> H <sub>17</sub> O <sub>9</sub> <sup>-</sup>  | 341.08781 | 341.08730 | 1.48  | 135(8), 162(3), <b>179</b> (100), 180(8), 181(9), 295(3)               | <b>135</b> (100)                                                       | <b>135</b> (100)                                                     | 10.1021/np020018i             |
| 18 | Syringoyl-galloyl hexoside II       | 5.24 | C <sub>22</sub> H <sub>23</sub> O <sub>14</sub> <sup>-</sup> | 511.10933 | 511.10912 | 0.41  | 168(12), <b>169</b> (100), 183(25), 271(32), 285(10), 313(91), 467(14) | <b>125</b> (100)                                                       |                                                                      | 10.3390/molecules26051201     |
| 19 | 5-O-Caffeoylquinic acida            | 5.25 | C <sub>16</sub> H <sub>17</sub> O <sub>9</sub> <sup>-</sup>  | 353.08781 | 353.08750 | 0.87  | 179(3), <b>191</b> (100), 192(7), 305(3)                               | 85(86), 93(60), 109(27), 111(33), <b>127</b> (100), 171(30), 173(90)   | <b>85</b> (100), 99(34), 109(39)                                     | 10.1016/j.jff.2012.05.002     |
| 20 | Trigalloylquinic acid               | 5.52 | C <sub>28</sub> H <sub>23</sub> O <sub>18</sub> <sup>-</sup> | 647.08899 | 647.08845 | 0.84  | 343(4), 477(12), <b>495</b> (100), 496(21), 497(4), 609(13), 610(4)    | 169(19), 191(3), 193(4), 289(3), 325(46), <b>343</b> (100), 477(4)     | 125(8), <b>169</b> (100), 173(11), 191(19)                           |                               |
| 21 | Dicaffeoylalttracic acid I          | 5.65 | C <sub>24</sub> H <sub>11</sub> O <sub>14</sub> <sup>-</sup> | 533.09368 | 533.09407 | -0.73 | 209(8), 353(3), <b>371</b> (100), 372(13)                              | 191(13), <b>209</b> (100), 353(8)                                      | <b>85</b> (15), 173(3), 191(100)                                     | 10.3390/metabo10100407        |
| 22 | Caffeic acid pentoside I            | 5.66 | C <sub>14</sub> H <sub>15</sub> O <sub>8</sub> <sup>-</sup>  | 311.07724 | 311.07698 | 0.82  | 131(4), 135(7), <b>149</b> (100), 150(5), 178(3), 179(93), 180(6)      | 59(6), 73(5), 88(6), 89(42), 103(18), <b>131</b> (100), 134(3)         | 59(55), 73(37), 87(19), <b>103</b> (100)                             |                               |
| 23 | Ellagic acid hexoside               | 5.73 | C <sub>20</sub> H <sub>15</sub> O <sub>13</sub> <sup>-</sup> | 463.05181 | 463.05209 | -0.60 | 300(22), <b>301</b> (100), 302(15)                                     | 185(39), 201(14), 229(67), <b>257</b> (100), 258(17), 284(38), 301(39) | 173(6), <b>185</b> (100), 201(10), 213(20), 229(13), 229(78), 438(7) | 10.3390/molecules26051201     |
| 24 | Caffeic acid                        | 5.76 | C <sub>9</sub> H <sub>7</sub> O <sub>4</sub> <sup>-</sup>    | 179.03498 | 179.03508 | -0.56 | <b>135</b> (100), 136(6)                                               | 79(7), 91(13), 93(5), <b>107</b> (100), 117(5), 135(44)                |                                                                      | 10.1002/cbdv.201600463        |
| 25 | Syringoyl-methylgalloyl hexoside I  | 5.76 | C <sub>23</sub> H <sub>25</sub> O <sub>14</sub> <sup>-</sup> | 525.12498 | 525.12452 | 0.88  | 168(6), <b>183</b> (100), 184(9), 197(7), 225(7), 285(21), 327(10)     | 124(9), 139(64), <b>168</b> (100)                                      | <b>124</b> (100)                                                     | 10.3390/molecules26051201     |
| 26 | Caffeoyl-(iso)citric acid           | 5.77 | C <sub>15</sub> H <sub>13</sub> O <sub>10</sub> <sup>-</sup> | 353.05142 | 353.05105 | 1.06  | 111(15), 155(7), <b>173</b> (100), 174(3), 191(72)                     | <b>111</b> (100), 129(4), 155(29)                                      | <b>67</b> (100)                                                      | 10.1002/jssc.201900407        |
| 27 | Caffeic acid pentoside II           | 5.91 | C <sub>14</sub> H <sub>15</sub> O <sub>8</sub> <sup>-</sup>  | 311.07724 | 311.07710 | 0.44  | 131(3), 135(9), <b>149</b> (100), 150(6), 179(74), 180(6)              | 73(4), 89(39), 103(15), <b>131</b> (100)                               | 59(23), 73(25), <b>103</b> (100)                                     |                               |
| 28 | Syringoyl-methylgalloyl hexoside II | 5.94 | C <sub>23</sub> H <sub>25</sub> O <sub>14</sub> <sup>-</sup> | 525.12498 | 525.12539 | -0.79 | 168(11), <b>183</b> (100), 184(12), 285(16), 327(8), 479(10), 487(9)   | 124(9), 139(65), <b>168</b> (100)                                      | <b>124</b> (100)                                                     | 10.3390/molecules26051201     |
| 29 | Methyl chlorogenate                 | 6.19 | C <sub>17</sub> H <sub>19</sub> O <sub>9</sub> <sup>-</sup>  | 367.10346 | 367.10337 | 0.24  | 173(6), <b>191</b> (100), 192(9), 193(5)                               | 85(42), 93(41), 109(36), 111(28), <b>127</b> (100), 171(33), 173(38)   | <b>85</b> (100), 99(87)                                              | 10.1016/j.micpath.2017.05.048 |
| 30 | Dicaffeoylalttracic acid II         | 6.25 | C <sub>24</sub> H <sub>11</sub> O <sub>14</sub> <sup>-</sup> | 533.09368 | 533.09391 | -0.43 | 191(5), 209(14), 339(5), 353(12), 370(12), <b>371</b> (100), 372(13)   | 191(19), <b>209</b> (100), 353(9)                                      | 85(18), 147(4), <b>191</b> (100)                                     | 10.3390/metabo10100407        |
| 31 | Coumaric acid hexoside              | 6.31 | C <sub>15</sub> H <sub>17</sub> O <sub>8</sub> <sup>-</sup>  | 325.09289 | 325.09276 | 0.39  | 101(9), 119(84), 120(11), 161(38), 162(13), <b>163</b> (100), 164(10)  | <b>91</b> (100)                                                        |                                                                      |                               |
| 32 | Dicaffeoylalttracic acid III        | 6.40 | C <sub>24</sub> H <sub>11</sub> O <sub>14</sub> <sup>-</sup> | 533.09368 | 533.09372 | -0.07 | 191(4), 209(13), 353(10), 369(3), <b>371</b> (100), 372(15), 487(3)    | 191(16), <b>209</b> (100), 353(13)                                     | 85(19), 147(5), 173(3), 191(15), <b>191</b> (100)                    | 10.3390/metabo10100407        |
| 33 | Disyringoyl hexoside I              | 6.40 | C <sub>24</sub> H <sub>27</sub> O <sub>14</sub> <sup>-</sup> | 539.14063 | 539.14086 | -0.42 | 182(12), 183(15), <b>197</b> (100), 198(10), 341(86), 342(14), 479(8)  | 121(6), 138(5), <b>153</b> (100), 182(70)                              | 121(27), <b>138</b> (100)                                            | 10.3390/molecules26051201     |

|                   |                               |       |                                                              |           |           |       |                                                                        |                                                                        |                                                                        |                           |
|-------------------|-------------------------------|-------|--------------------------------------------------------------|-----------|-----------|-------|------------------------------------------------------------------------|------------------------------------------------------------------------|------------------------------------------------------------------------|---------------------------|
| 34                | Mehylellagic acid hexoside    | 6.51  | C <sub>21</sub> H <sub>17</sub> O <sub>13</sub> <sup>-</sup> | 477.06746 | 477.06781 | -0.73 | 300(6), <b>315</b> (100), 316(13), 317(3)                              | <b>300</b> (100), 301(5)                                               | 200(48), 228(41), 243(38), 244(75), 271(41), 272(31), <b>300</b> (100) |                           |
| 35                | Disyringoyl hexoside II       | 6.56  | C <sub>24</sub> H <sub>27</sub> O <sub>14</sub> <sup>-</sup> | 539.14063 | 539.14080 | -0.31 | 182(14), 183(11), <b>197</b> (100), 198(11), 341(82), 342(14), 479(7)  | 121(5), 138(5), 153(71), <b>182</b> (100)                              | 123(4), 138(13), <b>167</b> (100)                                      | 10.3390/molecules26051201 |
| 36                | Coumaroyl-(iso)citric acid    | 6.62  | C <sub>15</sub> H <sub>13</sub> O <sub>9</sub> <sup>-</sup>  | 337.05651 | 337.05645 | 0.16  | 111(11), 155(4), <b>173</b> (100), 191(6)                              | <b>111</b> (100), 129(3), 155(26)                                      | <b>67</b> (100), 183(4)                                                |                           |
| 37                | Feruloyl-(iso)citric acid     | 6.70  | C <sub>16</sub> H <sub>15</sub> O <sub>10</sub> <sup>-</sup> | 367.06707 | 367.06730 | -0.64 | 111(9), 155(5), <b>173</b> (100), 174(3)                               | <b>111</b> (100), 129(3), 155(28)                                      | <b>67</b> (100)                                                        | 10.1002/jssc.201900407    |
| 38                | Ellagic acid                  | 6.74  | C <sub>14</sub> H <sub>5</sub> O <sub>8</sub> <sup>-</sup>   | 300.99899 | 300.99909 | -0.32 | 185(26), 229(36), 255(20), <b>257</b> (100), 271(54), 284(27), 301(43) | 157(18), <b>185</b> (100), 201(27), 213(25), 229(92), 242(17), 257(17) |                                                                        | 10.3390/molecules26051201 |
| 39                | Vanillic acid                 | 6.83  | C <sub>8</sub> H <sub>7</sub> O <sub>4</sub> <sup>-</sup>    | 167.03498 | 167.03515 | -1.02 | 97(10), 108(38), 121(43), 122(13), 123(13), 130(13), <b>152</b> (100)  | 83(4), <b>108</b> (100), 124(3)                                        | 73(31), <b>94</b> (100), 124(36)                                       | 10.3390/molecules22020313 |
| 40                | Dicaffeoylquinic acid I       | 7.11  | C <sub>25</sub> H <sub>23</sub> O <sub>12</sub> <sup>-</sup> | 515.11950 | 515.11938 | 0.23  | <b>353</b> (100), 354(14), 447(5), 477(6)                              | 135(9), 173(4), 179(40), <b>191</b> (100)                              | 85(79), 93(61), 109(14), 111(38), <b>127</b> (100), 171(30), 173(57)   | 10.3390/molecules26051201 |
| 41                | Dicaffeoylquinic acid II      | 7.26  | C <sub>25</sub> H <sub>23</sub> O <sub>12</sub> <sup>-</sup> | 515.11950 | 515.11905 | 0.88  | 203(9), 299(6), 315(5), <b>353</b> (100), 354(16), 477(37), 478(10)    | 135(12), <b>173</b> (100), 179(83), 191(93)                            | 57(8), 59(15), <b>93</b> (100), 109(11), 111(84), 137(8), 155(19)      | 10.3390/molecules26051201 |
| 42                | Tricaffeoylglucaric acid      | 7.45  | C <sub>33</sub> H <sub>27</sub> O <sub>17</sub> <sup>-</sup> | 695.12537 | 695.12593 | -0.81 | 209(4), 353(5), 371(42), 372(6), 515(7), <b>533</b> (100), 534(23)     | 191(6), 209(18), 353(11), 371(21), <b>371</b> (100)                    | 191(16), <b>209</b> (100), 353(10)                                     | 10.3390/metabo11040220    |
| 43                | Methylellagic acid            | 7.82  | C <sub>15</sub> H <sub>7</sub> O <sub>8</sub> <sup>-</sup>   | 315.01464 | 315.01444 | 0.65  | 235(3), <b>300</b> (100), 301(16)                                      | 200(44), 216(22), 228(27), 243(23), 244(93), 271(61), <b>300</b> (100) |                                                                        |                           |
| 44                | Ferulic acid                  | 7.99  | C <sub>10</sub> H <sub>9</sub> O <sub>4</sub> <sup>-</sup>   | 193.05063 | 193.05057 | 0.30  | 129(4), 134(5), <b>147</b> (100), 148(5), 149(9), 150(3), 178(5)       | 75(9), 99(5), 101(7), 115(11), 117(6), 119(9), <b>129</b> (100)        | 55(10), 57(35), <b>85</b> (100), 123(16)                               | 10.3390/molecules22020313 |
| 45                | Dimethylellagic acid hexoside | 8.71  | C <sub>22</sub> H <sub>19</sub> O <sub>13</sub> <sup>-</sup> | 491.08311 | 491.08313 | -0.03 | <b>329</b> (100), 330(23), 331(19), 342(18), 371(9), 464(5), 476(4)    | 283(7), 286(32), 291(4), 301(20), 311(5), <b>314</b> (100), 315(7)     | 242(3), 258(19), <b>286</b> (100)                                      |                           |
| 46                | Dimethylellagic acid          | 10.50 | C <sub>16</sub> H <sub>9</sub> O <sub>8</sub> <sup>-</sup>   | 329.03029 | 329.02968 | 1.85  | 286(19), 287(3), 301(8), <b>314</b> (100), 315(9), 316(5)              | 258(7), <b>286</b> (100)                                               | 202(19), 230(27), 242(5), <b>258</b> (100), 269(3), 286(4)             |                           |
| <b>Flavonoids</b> |                               |       |                                                              |           |           |       |                                                                        |                                                                        |                                                                        |                           |
| 47                | Quercetagetin                 | 7.35  | C <sub>15</sub> H <sub>9</sub> O <sub>8</sub> <sup>-</sup>   | 317.03029 | 317.03013 | 0.50  | 167(58), 195(49), 245(39), <b>271</b> (100), 287(45), 299(79), 300(51) | 183(4), 199(68), 215(11), 227(18), 241(3), <b>243</b> (100)            | 171(11), 187(13), 198(5), <b>199</b> (100), 201(4), 215(68), 225(4)    | 10.1007/s13197-016-2228-6 |
| 48                | Luteolin <sup>a</sup>         | 8.65  | C <sub>15</sub> H <sub>9</sub> O <sub>6</sub> <sup>-</sup>   | 285.04046 | 285.04048 | -0.06 | 175(69), 199(67), 217(55), 241(80), 243(45), <b>285</b> (100), 286(32) | <b>197</b> (100), 198(91), 199(83), 212(10), 213(52), 214(15), 226(24) | 142(3), 153(35), 155(3), <b>169</b> (100), 182(34), 198(11), 288(8)    | 10.3390/molecules22020313 |
| 49                | 6-Hydroxykaempferol           | 8.73  | C <sub>15</sub> H <sub>9</sub> O <sub>7</sub> <sup>-</sup>   | 301.03538 | 301.03502 | 1.17  | 177(18), 255(23), 257(38), 271(41), 273(20), <b>283</b> (100), 284(19) | 201(3), 211(6), 227(9), 239(27), <b>255</b> (100), 265(3), 283(3)      | 182(4), 183(8), 187(23), 209(5), 211(93), <b>227</b> (100), 255(12)    | 10.1021/acs.jafc.0c02042  |

|                             |                                          |       |                                                              |           |           |       |                                                                        |                                                                        |                                                                        |                                                                                                                                                                                                                                                                             |
|-----------------------------|------------------------------------------|-------|--------------------------------------------------------------|-----------|-----------|-------|------------------------------------------------------------------------|------------------------------------------------------------------------|------------------------------------------------------------------------|-----------------------------------------------------------------------------------------------------------------------------------------------------------------------------------------------------------------------------------------------------------------------------|
| 50                          | 8-Hydroxy-3-O-methylquercetagenin        | 8.78  | C <sub>16</sub> H <sub>11</sub> O <sub>19</sub>              | 347.04086 | 347.04041 | 1.28  | 193(32), 209(35), 237(51), 286(18), 329(34), 330(28), <b>332</b> (100) | 166(35), 195(35), <b>286</b> (100), 287(61), 288(49), 303(76), 304(21) | 202(8), 214(5), 230(11), 241(7), 257(16), <b>258</b> (100), 259(10)    |                                                                                                                                                                                                                                                                             |
| 51                          | Patuletin                                | 8.78  | C <sub>16</sub> H <sub>11</sub> O <sub>8</sub> <sup>-</sup>  | 331.04594 | 331.04539 | 1.65  | 166(3), 181(3), 314(3), <b>316</b> (100), 317(10)                      | 166(90), 243(36), 255(25), 270(57), 271(85), <b>287</b> (100), 288(42) | 215(40), 231(25), 241(22), 243(47), 258(19), <b>259</b> (100), 287(14) | 10.1007/s11094-021-02387-z                                                                                                                                                                                                                                                  |
| 52                          | Apigenin <sup>a</sup>                    | 9.52  | C <sub>15</sub> H <sub>9</sub> O <sub>5</sub> <sup>-</sup>   | 269.04555 | 269.04547 | 0.28  | 149(55), 151(73), 181(19), 201(37), <b>225</b> (100), 227(24), 269(67) | 157(7), 169(15), 180(12), <b>181</b> (100), 183(44), 196(22), 197(47)  |                                                                        |                                                                                                                                                                                                                                                                             |
| 53                          | Kaempferol <sup>a</sup>                  | 9.68  | C <sub>15</sub> H <sub>9</sub> O <sub>6</sub> <sup>-</sup>   | 285.04046 | 285.04026 | 0.72  | 169(15), 185(22), 213(13), 229(18), 239(17), 255(75), <b>285</b> (100) | 159(50), <b>183</b> (100), 184(7), 211(47), 213(20), 227(38), 255(17)  |                                                                        | 10.3390/molecules26051201                                                                                                                                                                                                                                                   |
| 54                          | Chrysoeriol <sup>a</sup>                 | 9,74  | C <sub>16</sub> H <sub>11</sub> O <sub>6</sub> <sup>-</sup>  | 299.05611 | 299.05614 | -0.11 | 217(10), <b>284</b> (100), 285(17)                                     | <b>256</b> (100), 257(3), 284(11), 285(3)                              | 158(19), 188(16), 199(16), 211(21), 212(18), <b>227</b> (100), 228(19) | <a href="http://www.orientjchem.org/vol12no3/chrysocriol-7-06-o-%CE%B1-l-arabinofuranosyl-%CE%B2-d-glucopyranoside-from-tagetes-patula/">http://www.orientjchem.org/vol12no3/chrysocriol-7-06-o-%CE%B1-l-arabinofuranosyl-%CE%B2-d-glucopyranoside-from-tagetes-patula/</a> |
| 55                          | 6-Methoxykaempferol                      | 9,79  | C <sub>16</sub> H <sub>11</sub> O <sub>7</sub> <sup>-</sup>  | 315.05103 | 315.05078 | 0.78  | 272(5), 300(6), <b>300</b> (100), 301(11)                              | 166(6), 254(4), 255(10), 256(6), 271(31), <b>272</b> (100)             | 199(4), 225(4), 227(5), 243(13), 254(50), <b>255</b> (100), 271(11)    | <a href="https://www.researchgate.net/publication/276272147_Ivancheva_St_Zdravkova_M_1993_Flavonoids_in_Tagetes_patula">https://www.researchgate.net/publication/276272147_Ivancheva_St_Zdravkova_M_1993_Flavonoids_in_Tagetes_patula</a>                                   |
| 56                          | Axillarin                                | 10,06 | C <sub>17</sub> H <sub>13</sub> O <sub>8</sub> <sup>-</sup>  | 345.06159 | 345.06120 | 1.13  | 287(3), 302(10), 329(5), <b>330</b> (100), 331(18), 332(4)             | 287(49), 301(9), <b>302</b> (100), 312(12), 315(17)                    | 284(3), 285(5), 286(34), <b>287</b> (100)                              | <a href="https://www.researchgate.net/publication/281677527_Flavonoids_from_the_flowers_of_Tagetes_erecta_L">https://www.researchgate.net/publication/281677527_Flavonoids_from_the_flowers_of_Tagetes_erecta_L</a>                                                         |
| 57                          | 5,7-Dimethylquercetin                    | 10,17 | C <sub>17</sub> H <sub>13</sub> O <sub>7</sub> <sup>-</sup>  | 329.06668 | 329.06608 | 1.82  | 171(4), <b>314</b> (100), 315(16), 316(9)                              | 271(6), <b>299</b> (100), 300(3)                                       | 165(3), 166(3), 227(9), 243(7), 255(12), <b>271</b> (100)              | <a href="http://en.cnki.com.cn/Article_en/CJFDTOTAL-HXYO200704003.htm">http://en.cnki.com.cn/Article_en/CJFDTOTAL-HXYO200704003.htm</a>                                                                                                                                     |
| 58                          | 8-Hydroxyquercetagenin                   | 11,11 | C <sub>15</sub> H <sub>9</sub> O <sub>9</sub> <sup>-</sup>   | 333.02521 | 333.02469 | 1.55  | <b>315</b> (100), 316(21), 317(6), 318(14)                             | <b>300</b> (100), 301(3)                                               | 216(8), 244(23), <b>272</b> (100)                                      | 10.3390/molecules26051201                                                                                                                                                                                                                                                   |
| <i>Flavonoid glycosides</i> |                                          |       |                                                              |           |           |       |                                                                        |                                                                        |                                                                        |                                                                                                                                                                                                                                                                             |
| 59                          | Quercetagenin 3,7-di-O-hexoside          | 4.88  | C <sub>27</sub> H <sub>29</sub> O <sub>18</sub> <sup>-</sup> | 641.13594 | 641.13557 | 0.57  | 317(39), 318(8), 477(4), 478(24), <b>479</b> (100), 480(37), 481(6)    | 315(4), 316(39), <b>317</b> (100)                                      | 167(47), 195(79), 208(40), 231(42), 245(44), <b>271</b> (100), 299(89) | 10.1039/C5AY02186C                                                                                                                                                                                                                                                          |
| 60                          | Quercetagenin 3-O-pentoside-7-O-hexoside | 4.93  | C <sub>26</sub> H <sub>27</sub> O <sub>17</sub> <sup>-</sup> | 611.12537 | 611.12476 | 1.00  | 316(10), 317(23), <b>449</b> (100), 450(19), 478(18), 479(21), 563(4)  | 309(3), <b>316</b> (100), 317(87), 329(3)                              | 139(26), <b>166</b> (100), 194(32), 255(34), 270(50), 271(92), 287(59) | 10.1016/S0378-8741(97)00038-X                                                                                                                                                                                                                                               |
| 61                          | Quercetin 3,7-di-O-hexoside              | 5.13  | C <sub>27</sub> H <sub>29</sub> O <sub>17</sub> <sup>-</sup> | 625.14102 | 625.14083 | 0.32  | 301(22), 462(6), 462(19), <b>463</b> (100), 464(24), 465(5), 563(5)    | 299(8), 300(55), <b>301</b> (100), 343(6)                              | 117(9), <b>151</b> (100), 179(79), 193(38), 255(36), 257(20), 273(38)  | 10.17660/ActaHortic.1999.501.34                                                                                                                                                                                                                                             |
| 62                          | Patuletin 3,7-di-O-hexoside I            | 5.20  | C <sub>28</sub> H <sub>31</sub> O <sub>18</sub> <sup>-</sup> | 655.15159 | 655.15160 | -0.01 | 331(14), 373(3), 492(17), <b>493</b> (100), 494(24), 495(7), 535(4)    | 315(16), 316(8), 329(5), 330(41), <b>331</b> (100), 373(10), 478(10)   | 271(4), 287(4), 288(3), <b>316</b> (100)                               | 10.1007/s11094-021-02387-z                                                                                                                                                                                                                                                  |
| 63                          | Quercetin 3-O-pentoside-7-O-hexoside     | 5.22  | C <sub>26</sub> H <sub>27</sub> O <sub>16</sub> <sup>-</sup> | 595.13046 | 595.13007 | 0.66  | 301(27), <b>433</b> (100), 434(27), 462(80), 463(65), 464(13), 475(9)  | 151(3), 179(3), 271(3), <b>300</b> (100), 301(35), 343(7)              | 179(3), 227(3), 243(3), 254(13), 255(12), <b>271</b> (100), 272(12)    |                                                                                                                                                                                                                                                                             |

|    |                                                                    |      |                                                              |           |           |       |                                                                        |                                                                        |                                                                        |                                 |
|----|--------------------------------------------------------------------|------|--------------------------------------------------------------|-----------|-----------|-------|------------------------------------------------------------------------|------------------------------------------------------------------------|------------------------------------------------------------------------|---------------------------------|
| 64 | Patuletin 3- <i>O</i> -pentoside-7- <i>O</i> -hexoside             | 5.32 | C <sub>27</sub> H <sub>29</sub> O <sub>17</sub> <sup>-</sup> | 625.14102 | 625.14097 | 0.08  | 331(10), <b>463</b> (100), 464(16), 492(80), 493(78), 494(14), 505(6)  | 300(9), 301(10), 315(36), <b>330</b> (100), 331(40), 373(6), 448(22)   | 180(9), 287(5), 301(5), 312(26), <b>315</b> (100), 316(20)             |                                 |
| 65 | 6-Methoxykaempferol 3- <i>O</i> -pentoside-7- <i>O</i> -hexoside   | 5.49 | C <sub>27</sub> H <sub>29</sub> O <sub>16</sub> <sup>-</sup> | 609.14611 | 609.14586 | 0.41  | <b>447</b> (100), 448(24), 449(4), 463(4), 476(16), 477(14), 489(17)   | 285(4), 299(44), 300(6), <b>314</b> (100), 315(23), 357(19), 432(60)   | 179(5), 180(5), 268(6), 271(11), 285(3), 286(3), <b>299</b> (100)      |                                 |
| 66 | Patuletin 3,7-di- <i>O</i> -hexoside II                            | 5.86 | C <sub>28</sub> H <sub>31</sub> O <sub>18</sub> <sup>-</sup> | 655.15159 | 655.15179 | -0.32 | 331(5), 479(5), <b>493</b> (100), 494(28), 607(4), 609(44)             | 316(4), 330(6), <b>331</b> (100), 373(4)                               | 288(3), <b>316</b> (100)                                               | 10.1007/s11094-021-02387-z      |
| 67 | Quercetin 3- <i>O</i> -hexoside-7- <i>O</i> -rhamnoside            | 5.90 | C <sub>27</sub> H <sub>29</sub> O <sub>16</sub> <sup>-</sup> | 609.14611 | 609.14576 | 0.57  | 301(26), 431(7), 446(22), <b>447</b> (100), 448(30), 463(58), 464(18)  | 299(3), 300(5), <b>301</b> (100)                                       | 107(8), <b>151</b> (100), 179(63), 229(12), 255(19), 273(11), 301(11)  |                                 |
| 68 | Patuletin 3- <i>O</i> -(2''-hexosyl)hexoside                       | 5.99 | C <sub>28</sub> H <sub>31</sub> O <sub>18</sub> <sup>-</sup> | 655.15159 | 655.15168 | -0.13 | 315(26), 316(32), <b>330</b> (100), 331(80), 332(21), 475(29), 493(42) | 287(6), <b>315</b> (100), 316(37)                                      | 175(10), 227(5), 243(8), 245(10), 259(9), 271(20), <b>287</b> (100)    | 10.1007/s11094-021-02387-z      |
| 69 | Quercetin 3- <i>O</i> -rhamnoside-7- <i>O</i> -pentoside           | 6.06 | C <sub>26</sub> H <sub>27</sub> O <sub>15</sub> <sup>-</sup> | 579.13554 | 579.13561 | -0.11 | 301(26), 433(99), <b>446</b> (100), 447(73)                            | <b>299</b> (100)                                                       |                                                                        |                                 |
| 70 | Quercetin 3- <i>O</i> -(6''-hexosyl)hexoside                       | 6.07 | C <sub>27</sub> H <sub>29</sub> O <sub>17</sub> <sup>-</sup> | 625.14102 | 625.14123 | -0.33 | 271(6), 300(37), <b>301</b> (100), 302(12), 343(10), 463(4), 579(45)   | 151(64), <b>179</b> (100), 229(6), 256(7), 257(14), 272(8), 273(15)    | <b>151</b> (100)                                                       | 10.17660/ActaHortic.1999.501.34 |
| 71 | Quercetagenin 6- <i>O</i> -hexoside                                | 6.13 | C <sub>21</sub> H <sub>19</sub> O <sub>13</sub> <sup>-</sup> | 479.08311 | 479.08347 | -0.74 | 315(6), 316(7), <b>317</b> (100), 318(22)                              | 139(47), 167(68), 195(39), 227(33), 243(35), <b>271</b> (100), 299(44) | 145(5), 187(11), 199(72), 215(22), 227(20), 242(5), <b>243</b> (100)   | 10.1016/j.phytol.2016.04.004    |
| 72 | Quercetin 3- <i>O</i> -(6''-galloyl)hexoside-7- <i>O</i> -hexoside | 6.14 | C <sub>34</sub> H <sub>33</sub> O <sub>21</sub> <sup>-</sup> | 777.15198 | 777.15349 | -1.94 | <b>615</b> (100), 616(25)                                              | 301(13), <b>463</b> (100)                                              | 300(3), 300(46), <b>301</b> (100), 343(3)                              | 10.1515/znc-2014-4165           |
| 73 | Patuletin 3- <i>O</i> -(6''-hexosyl)hexoside                       | 6.20 | C <sub>28</sub> H <sub>31</sub> O <sub>18</sub> <sup>-</sup> | 655.15159 | 655.15200 | -0.62 | 287(12), 316(19), 330(11), <b>331</b> (100), 332(17), 373(6), 493(16)  | 287(3), <b>316</b> (100), 317(3)                                       | 166(7), 243(4), 244(7), 270(61), 271(46), <b>287</b> (100), 288(49)    | 10.1007/s11094-021-02387-z      |
| 74 | Quercetin 3- <i>O</i> -(6''-pentosyl)hexoside                      | 6.23 | C <sub>26</sub> H <sub>27</sub> O <sub>16</sub> <sup>-</sup> | 595.13046 | 595.13121 | -1.26 | 300(43), <b>301</b> (100), 302(15), 343(11), 447(70), 448(18), 463(8)  | 107(6), 151(85), <b>179</b> (100), 256(16), 257(22), 272(27), 273(25)  | <b>151</b> (100)                                                       | 10.1111/php.12619               |
| 75 | Quercetin 3,7-di- <i>O</i> -rhamnoside                             | 6.30 | C <sub>27</sub> H <sub>29</sub> O <sub>15</sub> <sup>-</sup> | 593.15119 | 593.15146 | -0.46 | 301(27), 302(4), 446(28), <b>447</b> (100), 448(22), 449(4), 555(4)    | 300(25), <b>301</b> (100), 343(3)                                      | 107(20), <b>151</b> (100), 179(56), 229(37), 255(56), 273(26), 283(20) |                                 |
| 76 | Kaempferol 3- <i>O</i> -pentoside-7- <i>O</i> -rhamnoside          | 6.32 | C <sub>26</sub> H <sub>27</sub> O <sub>14</sub> <sup>-</sup> | 563.14063 | 563.14038 | 0.44  | 285(12), <b>417</b> (100), 418(22), 419(4), 430(58), 431(32), 432(6)   | 151(3), 255(8), <b>284</b> (100), 285(19), 327(14)                     | 227(14), <b>255</b> (100), 256(22)                                     |                                 |
| 77 | Kaempferol 3- <i>O</i> -hexoside-7- <i>O</i> -pentoside            | 6.35 | C <sub>26</sub> H <sub>27</sub> O <sub>15</sub> <sup>-</sup> | 579.13554 | 579.13544 | 0.19  | 255(16), 284(47), <b>285</b> (100), 286(15), 327(16), 447(63), 448(13) | 151(23), 229(40), 239(21), 241(37), 256(57), <b>257</b> (100), 267(41) | 161(29), 163(44), 185(22), 213(26), <b>229</b> (100), 239(32), 240(15) |                                 |
| 78 | Kaempferol 3- <i>O</i> -(6''-hexosyl)hexoside                      | 6.37 | C <sub>27</sub> H <sub>29</sub> O <sub>16</sub> <sup>-</sup> | 609.14611 | 609.14585 | 0.43  | 257(9), 284(10), 284(27), <b>285</b> (100), 286(14), 327(16), 463(16)  | 151(36), 213(26), 229(46), 241(37), 256(32), <b>257</b> (100), 267(52) | 163(67), 173(5), 185(10), 189(16), 213(38), <b>229</b> (100), 239(23)  | 10.1016/0305-1978(87)90079-2    |
| 79 | Quercetin 3- <i>O</i> -(6''-galloyl)hexoside                       | 6.40 | C <sub>28</sub> H <sub>23</sub> O <sub>16</sub> <sup>-</sup> | 615.09916 | 615.09872 | 0.71  | 300(3), 301(15), 451(3), <b>463</b> (100), 464(21), 579(86), 580(3)    | 300(38), <b>301</b> (100)                                              | 151(76), <b>179</b> (100), 255(9), 257(12), 271(8), 273(15), 283(5)    | 10.1016/0031-9422(92)80489-2    |

|    |                                                 |      |                                                              |           |           |       |                                                                              |                                                                              |                                                                              |                              |
|----|-------------------------------------------------|------|--------------------------------------------------------------|-----------|-----------|-------|------------------------------------------------------------------------------|------------------------------------------------------------------------------|------------------------------------------------------------------------------|------------------------------|
| 80 | 6-Methoxykaempferol 3-O-(6"-hexosyl)hexoside    | 6.51 | C <sub>28</sub> H <sub>31</sub> O <sub>17</sub> <sup>-</sup> | 639.15667 | 639.15624 | 0.67  | 255(8), 271(21), 272(12),<br>300(30), <b>315</b> (100),<br>316(22), 331(21)  | <b>300</b> (100)                                                             | 166(4), 254(6), 255(14),<br>256(3), 271(49), <b>272</b> (100)                |                              |
| 81 | Patuletin 7-O-(6"-galloyl)hexoside              | 6.51 | C <sub>29</sub> H <sub>25</sub> O <sub>17</sub> <sup>-</sup> | 645.10972 | 645.11088 | -1.79 | 330(5), 331(16), 483(5),<br><b>493</b> (100), 494(26), 495(5),<br>609(4)     | 316(5), 330(23), <b>331</b> (100)                                            | 181(3), <b>316</b> (100)                                                     |                              |
| 82 | Kaempferol 3-O-rhamnoside-7-O-rhamnoside        | 6.65 | C <sub>27</sub> H <sub>29</sub> O <sub>14</sub> <sup>-</sup> | 577.15628 | 577.15577 | 0.88  | 285(33), 286(5), <b>431</b> (100),<br>432(19), 433(3), 531(11)               | 284(12), <b>285</b> (100)                                                    | 213(88), 215(61), 229(66),<br>241(75), <b>243</b> (100), 257(78),<br>285(82) | 10.1016/j.biopha.2017.06.064 |
| 83 | Quercetin 3-O-glucoside <sup>a</sup>            | 6.67 | C <sub>21</sub> H <sub>19</sub> O <sub>12</sub> <sup>-</sup> | 463.08820 | 463.08854 | -0.74 | 299(3), 300(22), <b>301</b> (100),<br>302(9)                                 | 151(77), <b>179</b> (100), 255(17),<br>257(12), 271(28), 272(15),<br>273(18) | <b>151</b> (100)                                                             | 10.1002/cbdv.201700415       |
| 84 | Kaempferol 3-O-rhamnoside-7-O-pentoside         | 6.73 | C <sub>26</sub> H <sub>27</sub> O <sub>14</sub> <sup>-</sup> | 563.14063 | 563.14165 | -1.80 | 285(6), 417(14), <b>431</b> (100),<br>432(22), 493(13)                       | <b>285</b> (100)                                                             | 213(51), 239(38), 241(38),<br>243(77), <b>257</b> (100), 267(49),<br>285(61) |                              |
| 85 | Kaempferol 7-O-(6"-galloyl)hexoside             | 6.74 | C <sub>28</sub> H <sub>23</sub> O <sub>15</sub> <sup>-</sup> | 599.10424 | 599.10439 | -0.24 | 285(17), 313(33), 447(36),<br>551(7), 553(10), <b>563</b> (100),<br>564(20)  | 285(11), 417(7), <b>431</b> (100)                                            | <b>285</b> (100)                                                             |                              |
| 86 | Patuletin 7-O-hexoside                          | 6.75 | C <sub>22</sub> H <sub>21</sub> O <sub>13</sub> <sup>-</sup> | 493.09877 | 493.09900 | -0.47 | <b>331</b> (100), 332(13), 373(4)                                            | 287(3), <b>316</b> (100), 317(3)                                             | 244(6), 270(60), 271(41),<br><b>287</b> (100), 288(40)                       |                              |
| 87 | 8-Hydroxy-3-O-methyl quercetagenin 6-O-hexoside | 6.76 | C <sub>22</sub> H <sub>21</sub> O <sub>14</sub> <sup>-</sup> | 509.09368 | 509.09417 | -0.96 | 345(13), 346(14),<br><b>347</b> (100), 371(14),<br>451(18), 463(10), 491(14) | 191(9), 193(63), 209(9),<br><b>237</b> (100), 238(9), 329(20),<br>332(55)    | 166(3), 194(6), 209(16),<br><b>222</b> (100)                                 |                              |
| 88 | Quercetin 3-O-galloyl-rhamnoside-7-O-rhamnoside | 6.95 | C <sub>34</sub> H <sub>33</sub> O <sub>19</sub> <sup>-</sup> | 745.16215 | 745.16282 | -0.90 | 301(41), 302(7), 446(7),<br><b>447</b> (100), 448(22),<br>599(16), 600(4)    | <b>301</b> (100)                                                             | 107(13), <b>151</b> (100), 179(70),<br>229(6), 255(10), 273(11),<br>301(13)  |                              |
| 89 | Kaempferol 3-O-glucoside <sup>a</sup>           | 6.97 | C <sub>21</sub> H <sub>19</sub> O <sub>11</sub> <sup>-</sup> | 447.09916 | 447.09650 | 5.94  | 231(24), 255(16),<br><b>284</b> (100), 285(68),<br>316(22), 317(17), 327(15) | 227(13), <b>255</b> (100), 256(16)                                           | 167(4), <b>211</b> (100), 213(4),<br>227(78), 255(22)                        | 10.1016/0305-1978(94)90034-5 |
| 90 | Quercetin 3-O-pentoside                         | 7.00 | C <sub>20</sub> H <sub>17</sub> O <sub>11</sub> <sup>-</sup> | 433.07764 | 433.07798 | -0.79 | 299(5), 300(24), <b>301</b> (100),<br>302(19)                                | 151(80), <b>179</b> (100), 255(7),<br>257(10), 272(8), 273(20),<br>283(15)   | <b>151</b> (100)                                                             | 10.3390/molecules24213911    |
| 91 | Patuletin 3-O-pentoside                         | 7.05 | C <sub>21</sub> H <sub>19</sub> O <sub>12</sub> <sup>-</sup> | 463.08820 | 463.08846 | -0.55 | 300(8), 301(23), 315(5),<br>329(11), 330(94),<br><b>331</b> (100), 332(18)   | 181(3), 315(6), <b>316</b> (100),<br>317(3)                                  | 166(12), 243(11), 270(49),<br>271(46), 272(14), <b>287</b> (100),<br>288(70) | 10.1177/1934578X20974507     |
| 92 | Quercetin 3-O-rhamnoside <sup>a</sup>           | 7.18 | C <sub>21</sub> H <sub>19</sub> O <sub>11</sub> <sup>-</sup> | 447.09329 | 447.09417 | -1.98 | 299(6), 300(33), <b>301</b> (100),<br>302(15)                                | 151(84), <b>179</b> (100), 229(11),<br>256(9), 272(9), 273(21),<br>283(20)   | <b>151</b> (100)                                                             | 10.1016/0305-1978(94)90034-5 |
| 93 | Axillarin 7-O-(6"rhamnosyl)hexoside             | 7.25 | C <sub>29</sub> H <sub>33</sub> O <sub>17</sub> <sup>-</sup> | 653.17232 | 653.17196 | 0.56  | 315(8), 329(19), 330(18),<br>344(48), <b>345</b> (100),<br>346(18), 607(32)  | 180(4), 195(14), 223(4),<br>315(4), <b>330</b> (100)                         | 284(3), 285(4), 301(4),<br>302(5), 312(20), 314(3),<br><b>315</b> (100)      |                              |
| 94 | Quercetin 3-O-(2"-galloyl)-pentoside            | 7.27 | C <sub>27</sub> H <sub>21</sub> O <sub>15</sub> <sup>-</sup> | 585.08859 | 585.08868 | -0.15 | 300(4), <b>301</b> (100), 302(14),<br>433(3)                                 | 151(77), <b>179</b> (100), 193(7),<br>229(4), 239(5), 257(12),<br>273(18)    | <b>151</b> (100)                                                             | 10.1371/journal.pone.0198739 |
| 95 | 6-Methoxykaempferol 7-O-hexoside                | 7.30 | C <sub>22</sub> H <sub>21</sub> O <sub>12</sub> <sup>-</sup> | 477.10385 | 477.10417 | -0.67 | 300(8), 313(4), 314(20),<br><b>315</b> (100), 316(18), 357(9),<br>462(3)     | 272(7), <b>300</b> (100), 301(4)                                             | 166(3), 254(6), 255(14),<br>256(6), 271(38), <b>272</b> (100)                |                              |

|     |                                                                    |      |                                                              |           |           |       |                                                                              |                                                                              |                                                                              |                               |
|-----|--------------------------------------------------------------------|------|--------------------------------------------------------------|-----------|-----------|-------|------------------------------------------------------------------------------|------------------------------------------------------------------------------|------------------------------------------------------------------------------|-------------------------------|
| 96  | Kaempferol 3- <i>O</i> -galloyl-rhamnoside-7- <i>O</i> -rhamnoside | 7.33 | C <sub>34</sub> H <sub>33</sub> O <sub>18</sub> <sup>-</sup> | 729.16724 | 729.16815 | -1.25 | 285(23), 297(22), 430(7),<br><b>431</b> (100), 432(19),<br>583(19), 584(6)   | 151(3), 284(23), <b>285</b> (100)                                            | <b>151</b> (100), 213(31), 229(7),<br>241(37), 243(11), 257(58),<br>285(13)  |                               |
| 97  | Kaempferol 3- <i>O</i> -pentoside                                  | 7.33 | C <sub>20</sub> H <sub>17</sub> O <sub>10</sub> <sup>-</sup> | 417.08272 | 417.08313 | -0.98 | 179(5), <b>284</b> (100), 285(39),<br>327(15), 361(8), 371(31),<br>383(11)   | 227(9), <b>255</b> (100), 256(24)                                            | 67(3), 167(6), 183(24),<br>211(96), 213(7), <b>227</b> (100),<br>255(48)     | 10.3390/molecules24213911     |
| 98  | Luteolin 7- <i>O</i> -glucoside <sup>a</sup>                       | 7.42 | C <sub>21</sub> H <sub>19</sub> O <sub>11</sub> <sup>-</sup> | 447.09329 | 447.09401 | -1.63 | <b>285</b> (100), 286(15)                                                    | 151(36), 175(73), 199(85),<br>217(67), <b>241</b> (100), 243(77),<br>285(41) | 183(17), 197(90), <b>198</b> (100),<br>199(30), 213(63), 214(15),<br>241(31) | 10.1016/0305-1978(94)90034-5  |
| 99  | 7-Methylquercetagenin 6- <i>O</i> -hexoside                        | 7.52 | C <sub>22</sub> H <sub>21</sub> O <sub>13</sub> <sup>-</sup> | 493.09877 | 493.09918 | -0.84 | 316(3), 329(17), <b>331</b> (100),<br>332(14), 333(3), 373(3),<br>447(11)    | 209(4), <b>316</b> (100)                                                     | 166(78), 243(42), 244(32),<br>270(33), 271(72), <b>287</b> (100),<br>288(41) | 10.1002/star.201500068        |
| 100 | 5,7-Dimethylquercetin 3- <i>O</i> -rutinoside                      | 7.56 | C <sub>29</sub> H <sub>33</sub> O <sub>16</sub> <sup>-</sup> | 637.17741 | 637.17770 | -0.45 | 271(22), 313(31), 314(15),<br>328(46), <b>329</b> (100),<br>330(22), 371(19) | 195(13), 286(9), 299(6),<br>301(3), 314(23), <b>314</b> (100),<br>315(5)     | 180(3), 271(22), 286(73),<br>287(3), 296(11), <b>299</b> (100)               |                               |
| 101 | Axillarin 7- <i>O</i> -hexoside                                    | 7.61 | C <sub>23</sub> H <sub>23</sub> O <sub>13</sub> <sup>-</sup> | 507.11442 | 507.11475 | -0.67 | 331(22), 337(13), 344(13),<br><b>345</b> (100), 346(19),<br>347(10), 492(35) | 166(3), <b>330</b> (100)                                                     | 179(4), 243(4), 271(5),<br>287(81), 312(69), <b>315</b> (100),<br>482(4)     | 10.1016/j.phytol.2016.04.004  |
| 102 | Kaempferol 3- <i>O</i> -(2''-galloyl)-pentoside                    | 7.68 | C <sub>27</sub> H <sub>21</sub> O <sub>14</sub> <sup>-</sup> | 569.09368 | 569.09381 | -0.23 | 283(27), 284(7), <b>285</b> (100),<br>286(13), 435(7), 507(6),<br>521(9)     | <b>151</b> (100), 213(19), 229(13),<br>239(11), 241(41), 257(82),<br>285(26) | 63(4), <b>107</b> (100)                                                      | 10.1038/s41598-019-54546-8    |
| 103 | 3,3'-Dimethylquercetin 7- <i>O</i> -hexoside                       | 7.72 | C <sub>23</sub> H <sub>23</sub> O <sub>12</sub> <sup>-</sup> | 491.11950 | 491.11965 | -0.31 | 193(11), 314(14), 315(18),<br><b>329</b> (100), 330(19),<br>476(59), 477(13) | <b>314</b> (100), 315(3)                                                     | 180(3), 270(3), 271(61),<br>285(3), 286(3), <b>299</b> (100)                 |                               |
| 104 | Trimethylquercetagenin rutinoside                                  | 7.72 | C <sub>30</sub> H <sub>35</sub> O <sub>17</sub> <sup>-</sup> | 667.18797 | 667.18805 | -0.12 | 329(46), 344(14),<br><b>359</b> (100), 360(19),<br>493(13), 629(39), 630(16) | 316(8), 329(16), <b>344</b> (100)                                            | 301(30), 316(54), <b>329</b> (100)                                           |                               |
| 105 | Patuletin 7- <i>O</i> -(6''-hydroxybenzoyl)hexoside                | 7.77 | C <sub>29</sub> H <sub>25</sub> O <sub>15</sub> <sup>-</sup> | 613.11989 | 613.12028 | -0.63 | 316(15), <b>331</b> (100),<br>463(61), 464(15), 491(93),<br>492(16), 598(23) | 181(8), 209(4), 272(7),<br>288(4), 303(4), <b>316</b> (100),<br>317(6)       | 188(10), 216(8), 244(9),<br>270(65), 271(29), <b>287</b> (100),<br>288(54)   |                               |
| 106 | Axillarin 7- <i>O</i> -(6''-caffeoyl)hexoside                      | 8.04 | C <sub>32</sub> H <sub>29</sub> O <sub>16</sub> <sup>-</sup> | 669.14611 | 669.14648 | -0.55 | 287(21), 316(17), 323(36),<br>330(25), <b>331</b> (100),<br>332(16), 345(49) | 181(3), 287(4), <b>316</b> (100),<br>317(7)                                  | 166(9), 179(3), 243(7),<br>270(58), 271(51), <b>287</b> (100),<br>288(52)    |                               |
| 107 | Axillarin 7- <i>O</i> -pentoside                                   | 8.05 | C <sub>22</sub> H <sub>21</sub> O <sub>12</sub> <sup>-</sup> | 477.10385 | 477.10417 | -0.67 | 343(3), <b>344</b> (100), 345(96),<br>346(14), 347(3), 387(4),<br>433(3)     | 301(7), <b>329</b> (100), 330(5)                                             | 175(5), 270(5), 285(3),<br>286(36), 301(26), 311(3),<br><b>314</b> (100)     |                               |
| 108 | Patuletin 3- <i>O</i> -(6''- <i>p</i> -coumaroyl)hexoside          | 8.10 | C <sub>31</sub> H <sub>27</sub> O <sub>15</sub> <sup>-</sup> | 639.13554 | 639.13487 | 1.05  | 287(8), 316(20), 331(9),<br><b>331</b> (100), 332(17), 489(6),<br>517(7)     | 209(5), 270(3), 287(3),<br><b>316</b> (100), 317(14)                         | 166(9), 243(6), 244(11),<br>270(54), 271(54), <b>287</b> (100),<br>288(67)   | 10.1016/S0305-1978(02)00250-8 |
| 109 | Quercetin 3- <i>O</i> -(6''-vaniloyl)hexoside                      | 8.26 | C <sub>29</sub> H <sub>25</sub> O <sub>15</sub> <sup>-</sup> | 613.11989 | 613.11902 | 1.42  | 299(10), 300(30),<br><b>301</b> (100), 302(15),<br>315(45), 316(6), 415(13)  | 151(77), <b>179</b> (100), 180(5),<br>256(6), 257(11), 272(6),<br>273(25)    | <b>151</b> (100)                                                             |                               |
| 110 | Quercetin 3- <i>O</i> -(2''-hydroxybenzoyl)-pentoside              | 8.35 | C <sub>27</sub> H <sub>21</sub> O <sub>13</sub> <sup>-</sup> | 553.09877 | 553.09880 | -0.06 | 299(10), 300(51),<br><b>301</b> (100), 302(26),<br>303(10), 433(10), 507(16) | 121(8), 151(52), 174(6),<br><b>179</b> (100), 228(6), 271(6),<br>273(12)     | 150(6), <b>151</b> (100), 169(3)                                             |                               |
| 111 | Kaempferol 7- <i>O</i> -rhamnoside                                 | 8.45 | C <sub>21</sub> H <sub>19</sub> O <sub>10</sub> <sup>-</sup> | 431.09837 | 431.09874 | -0.86 | 151(4), 257(3), 283(4),<br>284(30), <b>285</b> (100),<br>286(16), 393(5)     | 107(3), <b>151</b> (100), 213(16),<br>241(29), 257(47)                       | 65(3), 83(8), <b>107</b> (100)                                               | 10.3390/molecules24213911     |

|     |                                                          |      |                                                              |           |           |      |                                                                              |                                                                           |                                                |                  |
|-----|----------------------------------------------------------|------|--------------------------------------------------------------|-----------|-----------|------|------------------------------------------------------------------------------|---------------------------------------------------------------------------|------------------------------------------------|------------------|
| 112 | Patuletin 7- <i>O</i> -(6"-benzoyl)hexoside              | 8.96 | C <sub>29</sub> H <sub>25</sub> O <sub>14</sub> <sup>-</sup> | 597.12498 | 597.12494 | 0.07 | 316(18), 331(25),<br><b>331</b> (100), 332(18),<br>373(12), 479(8), 551(7)   | 270(3), 287(3), <b>316</b> (100),<br>317(9)                               | 270(56), 271(31), <b>287</b> (100),<br>288(37) |                  |
| 113 | Quercetin 3- <i>O</i> -(6"- <i>p</i> -coumaroyl)hexoside | 8.98 | C <sub>30</sub> H <sub>25</sub> O <sub>14</sub> <sup>-</sup> | 609.12498 | 609.12469 | 0.48 | 299(11), 300(33),<br><b>301</b> (100), 302(18),<br>315(32), 433(32), 447(11) | 151(48), <b>179</b> (100), 180(10),<br>192(7), 229(6), 256(8),<br>272(24) | <b>151</b> (100), 299(4)                       | 10.1002/jms.3982 |

<sup>a</sup>Confirmed using available standards, all the other compounds were identified based on MS/MS data. <sup>b</sup>Peaks that were further fragmentated in MS<sup>3</sup> and MS<sup>4</sup> experiment are marked bold in table.
