# Supplementary figures and images for: UHPLC-OrbiTrap MS Characterization of Phenolic Profiles in French Marigold Extracts and Analysis of Their Antifeedant Activity against Colorado Potato Beetle
Source: MDPI journal article supplement (doi:10.3390/plants11030407), 2022-02-01

RT: 0.00 - 20.01 SM: 5G

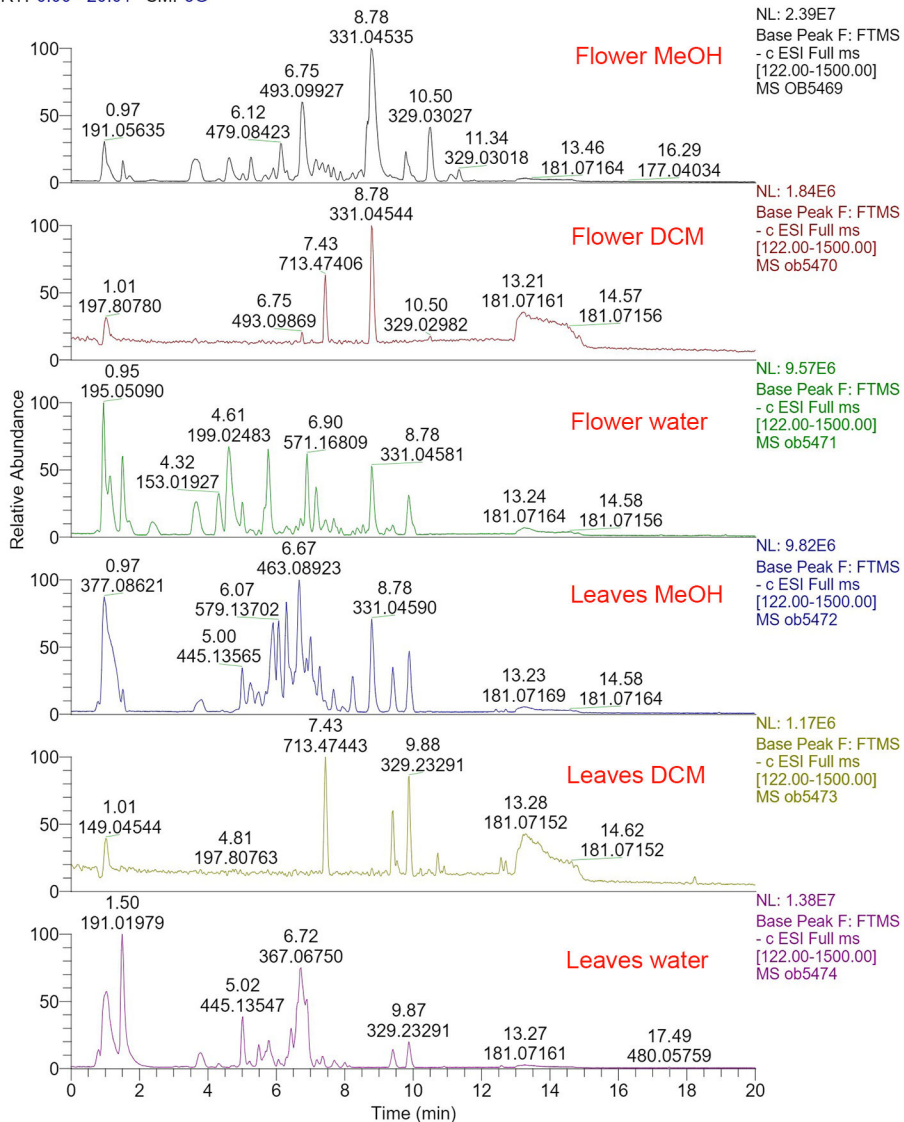

Supplement: s1 [file s1]
